# Supplementary material for: Identification and characterization of degradation products of Remdesivir using liquid chromatography/mass spectrometry
Source: Royal Society of Chemistry journal article supplement (doi:10.1039/d1nj00160d), 2021-01-01
Supplement: d1nj00160d1.pdf [file d1nj00160d1.pdf]

## Supporting data

### Identification and characterization of degradation products of Remdesivir using liquid chromatography/mass spectrometry

**Table S1.** Stress degradation conditions of the RDV

| Degradation study     | Exposure conditions                                           | Degradation products formed |
|-----------------------|---------------------------------------------------------------|-----------------------------|
| Acid hydrolysis       | 1 N HCl reflux at 70 °C for 6 h                               | DP1, DP2, DP3, DP4 and DP5  |
| Alkaline hydrolysis   | 0.1 N NaOH at RT for 10 min                                   | DP5, DP6, DP7 and DP8       |
| Neutral hydrolysis    | Reflux at 70 °C for 24 h                                      | DP5                         |
| Oxidative degradation | 3% H <sub>2</sub> O <sub>2</sub> at room temperature for 48 h | DP9                         |
| UV light              | 200 Whm <sup>-2</sup>                                         | No degradation              |
| Fluorescent light     | 1.2 million lux hours                                         | No degradation              |
| Thermal               | 100 °C for 5 d                                                | No degradation              |

h-hours, d-days, min-minutes

**Table S2.** Elemental composition of precursor and product ions of RDV and its degradation products.

| <i>RDV and its DPS<br/>(Retention time in min)</i> | <i>Elemental composition</i>                                                 | <i>Theoretical m/z</i> | <i>Experimental m/z</i> | <i>Mass error (Δ ppm)</i> |
|----------------------------------------------------|------------------------------------------------------------------------------|------------------------|-------------------------|---------------------------|
| RDV(12.55)                                         | C <sub>27</sub> H <sub>36</sub> N <sub>6</sub> O <sub>8</sub> P <sup>+</sup> | 603.2327               | 603.2333                | -0.96                     |
|                                                    | C <sub>21</sub> H <sub>24</sub> N <sub>6</sub> O <sub>8</sub> P <sup>+</sup> | 519.1388               | 519.1393                | -1.04                     |
|                                                    | C <sub>21</sub> H <sub>22</sub> N <sub>6</sub> O <sub>7</sub> P <sup>+</sup> | 501.1282               | 501.1287                | -0.94                     |
|                                                    | C <sub>20</sub> H <sub>22</sub> N <sub>6</sub> O <sub>6</sub> P <sup>+</sup> | 473.1333               | 473.1322                | 2.26                      |
|                                                    | C <sub>18</sub> H <sub>17</sub> N <sub>5</sub> O <sub>6</sub> P <sup>+</sup> | 430.0911               | 430.0917                | -1.38                     |
|                                                    | C <sub>18</sub> H <sub>29</sub> NO <sub>7</sub> P <sup>+</sup>               | 402.1676               | 402.1677                | -0.1                      |

|           |                         |          |          |       |
|-----------|-------------------------|----------|----------|-------|
|           | $C_{18}H_{27}NO_6P^+$   | 384.1571 | 384.1575 | -1.26 |
|           | $C_{15}H_{25}NO_5P^+$   | 330.1465 | 330.1468 | -0.83 |
|           | $C_{12}H_{17}NO_7P^+$   | 318.0737 | 318.0744 | -2    |
|           | $C_{12}H_{15}NO_6P^+$   | 300.0632 | 300.0635 | -1.3  |
|           | $C_{12}H_{13}NO_5P^+$   | 282.0523 | 282.0526 | 0.89  |
|           | $C_{12}H_{12}N_5O_3^+$  | 274.0935 | 274.0936 | -0.38 |
|           | $C_{11}H_{15}NO_5P^+$   | 272.0682 | 272.0686 | -1.25 |
|           | $C_{12}H_{10}N_5O_2^+$  | 256.0829 | 256.0831 | -0.71 |
|           | $C_{11}H_{13}NO_4P^+$   | 254.0577 | 254.0578 | -0.56 |
|           | $C_9H_{13}NO_5P^+$      | 246.0526 | 246.0529 | -1.12 |
|           | $C_{11}H_9N_4O_2^+$     | 229.0720 | 229.0724 | -1.71 |
|           | $C_9H_{11}NO_4P^+$      | 228.0420 | 228.0422 | -0.73 |
|           | $C_9H_8NO_4P^+$         | 211.0155 | 211.0151 | 1.89  |
|           | $C_9H_8N_5O^+$          | 202.0723 | 202.0726 | -1.13 |
|           | $C_8H_{11}NOP^+$        | 200.1471 | 200.1473 | -1.16 |
|           | $C_8H_7N_4O^+$          | 175.0614 | 175.0618 | -1.93 |
|           | $C_9H_{20}NO_2^+$       | 174.1489 | 174.1490 | -0.67 |
|           | $C_7H_7N_4^+$           | 147.0665 | 147.0668 | -1.71 |
|           | $C_3H_8NO_2^+$          | 90.0550  | 90.0550  | -0.52 |
|           | $C_2H_6N^+$             | 44.0495  | 44.0493  | 3.99  |
| DP1(3.21) | $C_{12}H_{15}N_5O_7P^+$ | 372.0704 | 372.0720 | -4.35 |
|           | $C_{12}H_{13}N_5O_6P^+$ | 354.0598 | 354.0597 | 0.4   |
|           | $C_{11}H_{14}N_4O_7P^+$ | 345.0595 | 345.0610 | -4.42 |
|           | $C_{12}H_{12}N_5O_3^+$  | 274.0935 | 274.0934 | 0.09  |
|           | $C_{12}H_{10}N_5O_2^+$  | 256.0829 | 256.0839 | -4.04 |

|           |                         |          |          |       |
|-----------|-------------------------|----------|----------|-------|
|           | $C_{11}H_9N_4O_2^+$     | 229.0720 | 229.0723 | -1.12 |
|           | $C_9H_8N_5O^+$          | 202.0723 | 202.0727 | -1.91 |
|           | $C_8H_7N_4O^+$          | 175.0614 | 175.0619 | -2.75 |
|           | $C_3H_8O_6P^+$          | 171.0053 | 171.0053 | -0.03 |
|           | $C_{17}H_7N_4^+$        | 147.0665 | 147.0670 | -3    |
|           | $H_4O_4P^+$             | 98.9842  | 98.9844  | -2.23 |
| DP2(6.52) | $C_{12}H_{14}N_5O_4^+$  | 292.1040 | 292.1048 | -2.59 |
|           | $C_{12}H_{12}N_5O_3^+$  | 274.0935 | 274.0926 | 3.07  |
|           | $C_{11}H_{13}N_4O_4^+$  | 265.0931 | 265.0928 | 1.1   |
|           | $C_{11}H_{11}N_4O_3^+$  | 247.0826 | 247.0817 | 3.35  |
|           | $C_9H_8N_5O^+$          | 202.0723 | 202.0722 | 0.69  |
|           | $C_8H_7N_4O^+$          | 175.0614 | 175.0615 | -0.46 |
|           | $C_7H_7N_4^+$           | 147.0665 | 147.0667 | -1.26 |
|           | $C_6H_6N_4^+$           | 134.0587 | 134.0588 | -0.85 |
|           | $C_5HN_2^+$             | 92.0369  | 92.0368  | 0.8   |
| DP3(7.85) | $C_{18}H_{19}N_5O_7P^+$ | 448.1017 | 448.1030 | -2.96 |
|           | $C_{18}H_{17}N_5O_6P^+$ | 430.0911 | 430.0927 | -3.62 |
|           | $C_{17}H_{18}N_4O_7P^+$ | 421.0908 | 421.0911 | -0.84 |
|           | $C_{18}H_{15}N_5O_5P^+$ | 412.0805 | 412.0828 | -5.55 |
|           | $C_{17}H_{16}N_4OP^+$   | 403.0802 | 403.0818 | -3.91 |
|           | $C_{12}H_{12}N_5O_3^+$  | 274.0935 | 274.0934 | 0.18  |
|           | $C_{12}H_{10}N_5O_2^+$  | 256.0829 | 256.0833 | -1.53 |
|           | $C_9H_{12}O_6P^+$       | 247.0366 | 247.0370 | -1.71 |
|           | $C_{11}H_9N_4O_2^+$     | 229.0720 | 229.0723 | -1.23 |
|           | $C_9H_8N_5O^+$          | 202.0723 | 202.0727 | -1.7  |

|            |                         |          |          |       |
|------------|-------------------------|----------|----------|-------|
|            | $C_8H_7N_4O^+$          | 175.0614 | 175.0617 | -1.66 |
|            | $C_3H_6O_5P^+$          | 152.9947 | 152.9937 | 6.76  |
|            | $C_7H_7N_4^+$           | 147.0665 | 147.0666 | -0.22 |
| DP4(9.37)  | $C_9H_{20}NO_2^+$       | 174.1489 | 174.1495 | -3.47 |
|            | $C_3H_8NO_2^+$          | 90.0550  | 90.0551  | -1.49 |
|            | $C_6H_{13}^+$           | 85.1012  | 85.1012  | -0.67 |
|            | $C_4H_9^+$              | 57.0699  | 57.0698  | 1.22  |
|            | $C_2H_6N^+$             | 44.0495  | 44.0493  | 5.01  |
|            | $C_3H_7^+$              | 43.0542  | 43.0542  | 1.55  |
|            | $C_3H_5^+$              | 41.0386  | 41.0385  | 1.03  |
| DP5(10.47) | $C_{27}H_{38}N_6O_9P^+$ | 621.2432 | 621.2439 | -1.13 |
|            | $C_{18}H_{29}NO_7P^+$   | 402.1676 | 402.1664 | 2.91  |
|            | $C_{18}H_{27}NO_6P^+$   | 384.1571 | 384.1565 | 1.45  |
|            | $C_{15}H_{25}NO_5P^+$   | 330.1465 | 330.1447 | 5.36  |
|            | $C_{12}H_{17}NO_7P^+$   | 318.0737 | 318.0734 | 0.68  |
|            | $C_{12}H_{15}NO_6P^+$   | 300.0632 | 300.0644 | -4.05 |
|            | $C_{12}H_{14}N_5O_4P^+$ | 292.1040 | 292.1040 | -0.03 |
|            | $C_{12}H_2N_5O_3^+$     | 274.0935 | 274.0938 | -1.24 |
|            | $C_{11}H_{15}NO_5P^+$   | 272.0682 | 272.0684 | -0.74 |
|            | $C_{11}H_{13}NO_4P^+$   | 254.0577 | 254.0587 | -3.93 |
|            | $C_{11}H_{11}N_4O_3^+$  | 247.0826 | 247.0819 | 2.78  |
|            | $C_9H_{13}NO_5P^+$      | 246.0526 | 246.0527 | -0.39 |
|            | $C_{11}H_9N_4O_2^+$     | 229.0720 | 229.0717 | 1.14  |
|            | $C_9H_{11}NO_4P^+$      | 228.0420 | 228.0416 | 1.81  |
|            | $C_9H_{10}N_5O_2^+$     | 220.0829 | 220.0827 | 0.83  |

|           |                         |          |          |       |
|-----------|-------------------------|----------|----------|-------|
|           | $C_9H_7N_4O_2^+$        | 203.0564 | 203.0563 | 0.25  |
|           | $C_8H_{11}NO_3P^+$      | 200.0471 | 200.0467 | 1.98  |
|           | $C_8H_7N_4O^+$          | 175.0614 | 175.0616 | -1.01 |
|           | $C_9H_{20}NO_2^+$       | 174.1489 | 174.1492 | -2.06 |
|           | $C_7H_7N_4^+$           | 147.0665 | 147.0672 | -4.81 |
|           | $C_3H_8NO_2^+$          | 90.0550  | 90.0551  | -1.5  |
|           | $C_2H_6N^+$             | 44.0495  | 44.0495  | 0.78  |
| DP6(5.31) | $C_{15}H_{20}N_6O_8P^+$ | 443.1075 | 443.1084 | -2    |
|           | $C_{15}H_{18}N_6O_7P^+$ | 425.0969 | 425.0975 | -1.42 |
|           | $C_{12}H_{13}N_5O_6P^+$ | 354.0598 | 354.0613 | -4.17 |
|           | $C_{12}H_{12}N_5O_3^+$  | 274.0935 | 274.0932 | 1.51  |
|           | $C_{12}H_{10}N_5O_2^+$  | 256.0829 | 256.0841 | -4.79 |
|           | $C_6H_{13}NO_7P^+$      | 242.0426 | 242.0425 | -0.52 |
|           | $C_{11}H_9N_4O_2^+$     | 229.0720 | 229.0720 | 0.01  |
|           | $C_6H_{11}NO_6P^+$      | 224.0319 | 224.0320 | -0.68 |
|           | $C_9H_8N_5O^+$          | 202.0723 | 202.0727 | -1.63 |
|           | $C_5H_{11}NO_5P^+$      | 196.0369 | 196.0374 | -2.5  |
|           | $C_5H_9NO_4P^+$         | 178.0264 | 178.0258 | 2.98  |
|           | $C_8H_7N_4O^+$          | 175.0614 | 175.0608 | 3.81  |
|           | $C_3H_9NO_5P^+$         | 170.0213 | 170.0212 | 0.24  |
|           | $C_7H_7N_4^+$           | 147.0665 | 147.0667 | -1.22 |
|           | $C_2H_7NO_3P^+$         | 124.0158 | 124.0159 | -0.98 |
|           | $C_3H_8NO_2^+$          | 90.0550  | 90.0551  | -1.29 |
|           | $C_2H_6N$               | 44.0495  | 44.0494  | 1.52  |
| DP7(8.87) | $C_{21}H_{24}N_6O_8P^+$ | 519.1388 | 519.1381 | 1.3   |

|           |                         |          |          |       |
|-----------|-------------------------|----------|----------|-------|
|           | $C_{21}H_{22}N_6O_7P^+$ | 501.1282 | 501.1272 | 0.93  |
|           | $C_{20}H_{22}N_6O_6P^+$ | 473.1333 | 473.1329 | 0.89  |
|           | $C_{18}H_{17}N_5O_6P^+$ | 430.0911 | 430.0899 | 2.7   |
|           | $C_{12}H_{17}NO_7P^+$   | 318.0737 | 318.0745 | -2.46 |
|           | $C_{12}H_{15}NO_6P^+$   | 300.0632 | 300.0634 | -0.91 |
|           | $C_{12}H_{13}NO_5P^+$   | 282.0526 | 282.0532 | -2.28 |
|           | $C_{12}H_{12}N_5O_3^+$  | 274.0935 | 274.0936 | -0.61 |
|           | $C_{11}H_{15}NO_5P^+$   | 272.0682 | 272.0688 | -2.04 |
|           | $C_{12}H_{10}N_5O_2^+$  | 256.0829 | 256.0831 | -0.84 |
|           | $C_{11}H_{13}NO_4P^+$   | 254.0577 | 254.0582 | -2.04 |
|           | $C_9H_{13}NO_5P^+$      | 246.0526 | 246.0530 | -1.87 |
|           | $C_{11}H_9N_4O_2^+$     | 229.0720 | 229.0723 | -1.47 |
|           | $C_9H_{11}NO_4P^+$      | 228.0420 | 228.0410 | 4.69  |
|           | $C_9H_8N_5O^+$          | 202.0723 | 202.0728 | -2.13 |
|           | $C_8H_{11}NO_3P^+$      | 200.0471 | 200.0473 | -1.2  |
|           | $C_8H_7N_4O^+$          | 175.0614 | 175.0624 | -5.52 |
|           | $C_7H_7N_4^+$           | 147.0665 | 147.0670 | -3.03 |
|           | $C_3H_8NO_2^+$          | 90.0550  | 90.1547  | 3.04  |
|           | $C_2H_6N^+$             | 44.0495  | 44.0493  | 3.65  |
| DP8(9.86) | $C_{21}H_{32}N_6O_8P^+$ | 527.2014 | 527.2000 | 2.52  |
|           | $C_{15}H_{20}N_6O_8P^+$ | 443.1075 | 443.1090 | -3.49 |
|           | $C_{15}H_{18}N_6O_7P^+$ | 425.0969 | 425.0971 | -0.54 |
|           | $C_{12}H_{13}N_5O_6P^+$ | 354.0598 | 354.0603 | -1.38 |
|           | $C_{12}H_{25}NO_7P^+$   | 326.1363 | 326.1373 | -2.97 |
|           | $C_{12}H_{23}NO_6P^+$   | 308.1258 | 308.1262 | -1.57 |

|            |                         |          |          |       |
|------------|-------------------------|----------|----------|-------|
|            | $C_{12}H_{12}N_5O_3^+$  | 274.0935 | 274.0941 | -2.22 |
|            | $C_{12}H_{10}N_5O_2^+$  | 256.0829 | 256.0837 | -3.29 |
|            | $C_9H_{21}NO_5P^+$      | 254.1152 | 254.1162 | -4.15 |
|            | $C_6H_{13}NO_7P^+$      | 242.0424 | 242.0430 | -2.59 |
|            | $C_{11}H_9N_4O_2^+$     | 229.0720 | 229.0726 | -2.63 |
|            | $C_6H_{11}NO_4P^+$      | 224.0319 | 224.0324 | -2.32 |
|            | $C_9H_8N_5O^+$          | 202.0723 | 202.0729 | -2.84 |
|            | $C_5H_{11}NO_5P^+$      | 196.0369 | 196.0374 | -2.42 |
|            | $C_5H_9NO_4P^+$         | 178.0264 | 178.0268 | -2.6  |
|            | $C_8H_7NO_4P^+$         | 175.0614 | 175.0618 | -2.14 |
|            | $C_9H_{20}NO_4^+$       | 174.1489 | 174.1493 | -2.63 |
|            | $C_3H_9NO_5P^+$         | 170.0213 | 170.0218 | -3.03 |
|            | $C_3H_7NOP^+$           | 152.0107 | 152.0114 | -4.3  |
|            | $C_7H_7N_4^+$           | 147.0665 | 147.0668 | -1.69 |
|            | $C_2H_7NO_3P^+$         | 124.0158 | 124.0160 | -1.87 |
|            | $C_3H_8NO_2^+$          | 90.0550  | 90.0551  | -1.47 |
|            | $C_2H_6N^+$             | 44.0495  | 44.0493  | 4.02  |
| DP9(11.96) | $C_{27}H_{36}N_6O_9P^+$ | 619.2276 | 619.2293 | -2.31 |
|            | $C_{21}H_{24}N_6O_9P^+$ | 535.1337 | 535.1306 | 5.71  |
|            | $C_{20}H_{22}N_6O_7P^+$ | 489.1282 | 489.1274 | 1.57  |
|            | $C_{18}H_{17}N_5O_7P^+$ | 446.086  | 446.0881 | -4.6  |
|            | $C_{18}H_{29}NO_7P^+$   | 402.1676 | 402.1675 | 0.3   |
|            | $C_{18}H_{27}NO_6P^+$   | 384.1571 | 384.1581 | -2.76 |
|            | $C_{15}H_{25}NO_5P^+$   | 330.1465 | 330.1474 | -2.78 |
|            | $C_{12}H_{17}NO_7P^+$   | 318.0737 | 318.0741 | -1.3  |

|  |                        |          |          |       |
|--|------------------------|----------|----------|-------|
|  | $C_{12}H_{15}NO_6P^+$  | 300.0632 | 300.0635 | -1.02 |
|  | $C_{12}H_{12}N_5O_4^+$ | 290.0884 | 290.0889 | -1.93 |
|  | $C_{11}H_{15}NO_5P^+$  | 272.0682 | 272.0682 | 0.3   |
|  | $C_{11}H_{13}NO_4P^+$  | 254.0577 | 254.0574 | 1.2   |
|  | $C_9H_{13}NO_5P^+$     | 246.0526 | 246.0525 | 0.32  |
|  | $C_{11}H_9N_4O_3^+$    | 245.0669 | 245.0676 | -2.68 |
|  | $C_9H_{11}NO_4P^+$     | 228.0420 | 228.0414 | 2.56  |
|  | $C_9H_8N_5O_2^+$       | 218.0673 | 218.0673 | -0.21 |
|  | $C_8H_{11}NO_3P^+$     | 200.0471 | 200.0476 | -2.62 |
|  | $C_8H_7N_4O_2^+$       | 191.0564 | 191.0565 | -0.82 |
|  | $C_9H_{20}NO_2^+$      | 174.1489 | 174.1483 | 2.91  |
|  | $C_3H_8NO_2^+$         | 90.0550  | 90.0553  | -3.93 |
|  | $C_2H_6N^+$            | 44.0495  | 44.0494  | 0.72  |



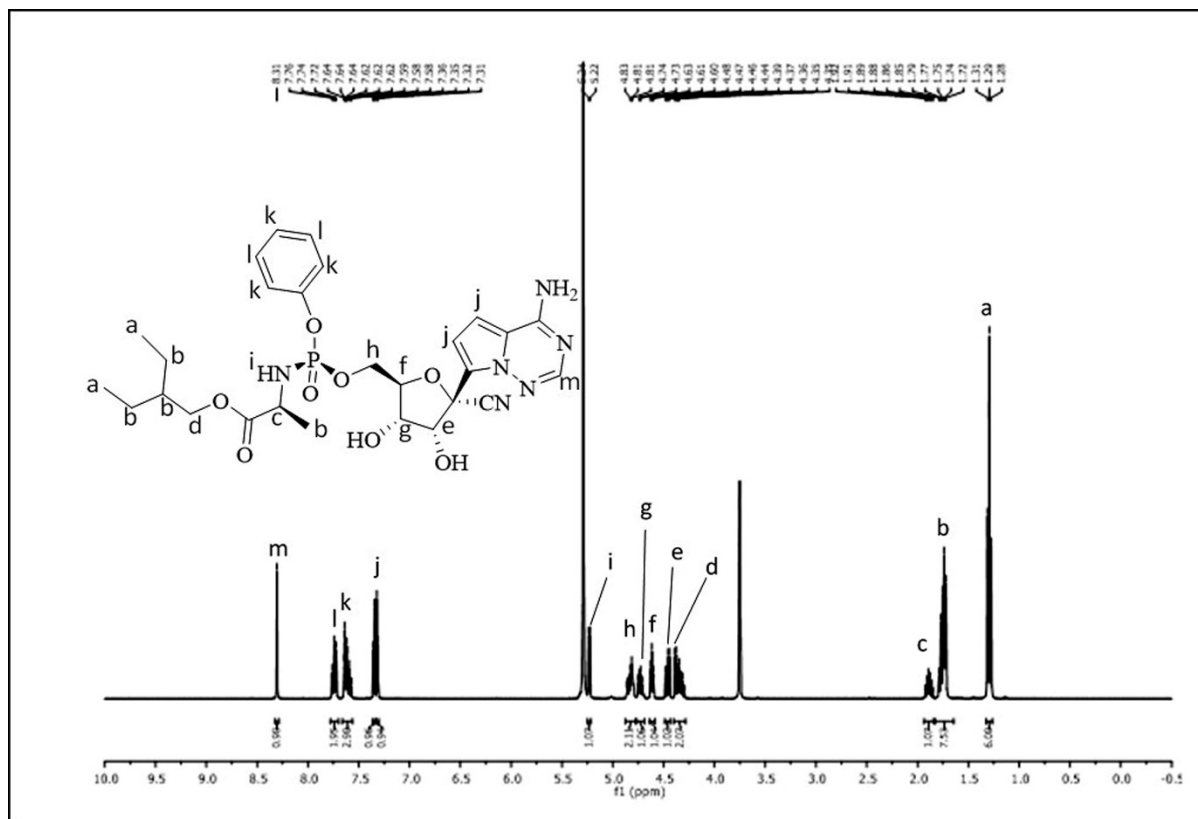

**Figure S1.** <sup>1</sup>H - NMR spectrum of RDV (400 MHz, MeOD):  $\delta$  8.31 (s, 1H), 7.78 – 7.70 (m, 2H), 7.66 – 7.56 (m, 3H), 7.35 (d, 1H), 7.32 (d, 1H), 5.23 (d, 1H), 4.87 – 4.78 (m, 2H), 4.73 (ddd, 1H), 4.61 (t, 1H), 4.46 (dd, 5.8 Hz, 1H), 4.40 – 4.28 (m, 2H), 1.89 (m, 1H), 1.83 – 1.65 (m, 8H), 1.29 (t, 6H).

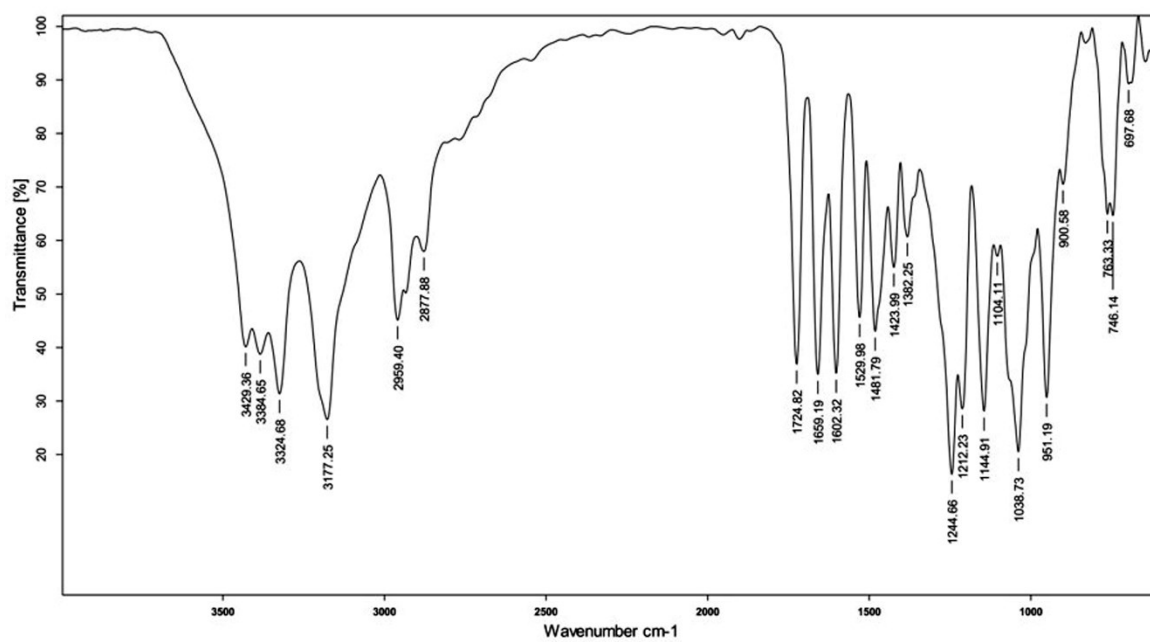

**Figure S2.** FTIR spectrum of RDV (KBr)

3429.36 cm<sup>-1</sup> observed due to N-H stretching of primary amine

3324.68 cm<sup>-1</sup> observed due to N-H stretching of secondary amine

3177.26 cm<sup>-1</sup> observed due to O-H (intermolecular hydrogen bonding) stretching of alcohol

1724.82 cm<sup>-1</sup> observed due to C=O stretching of ester

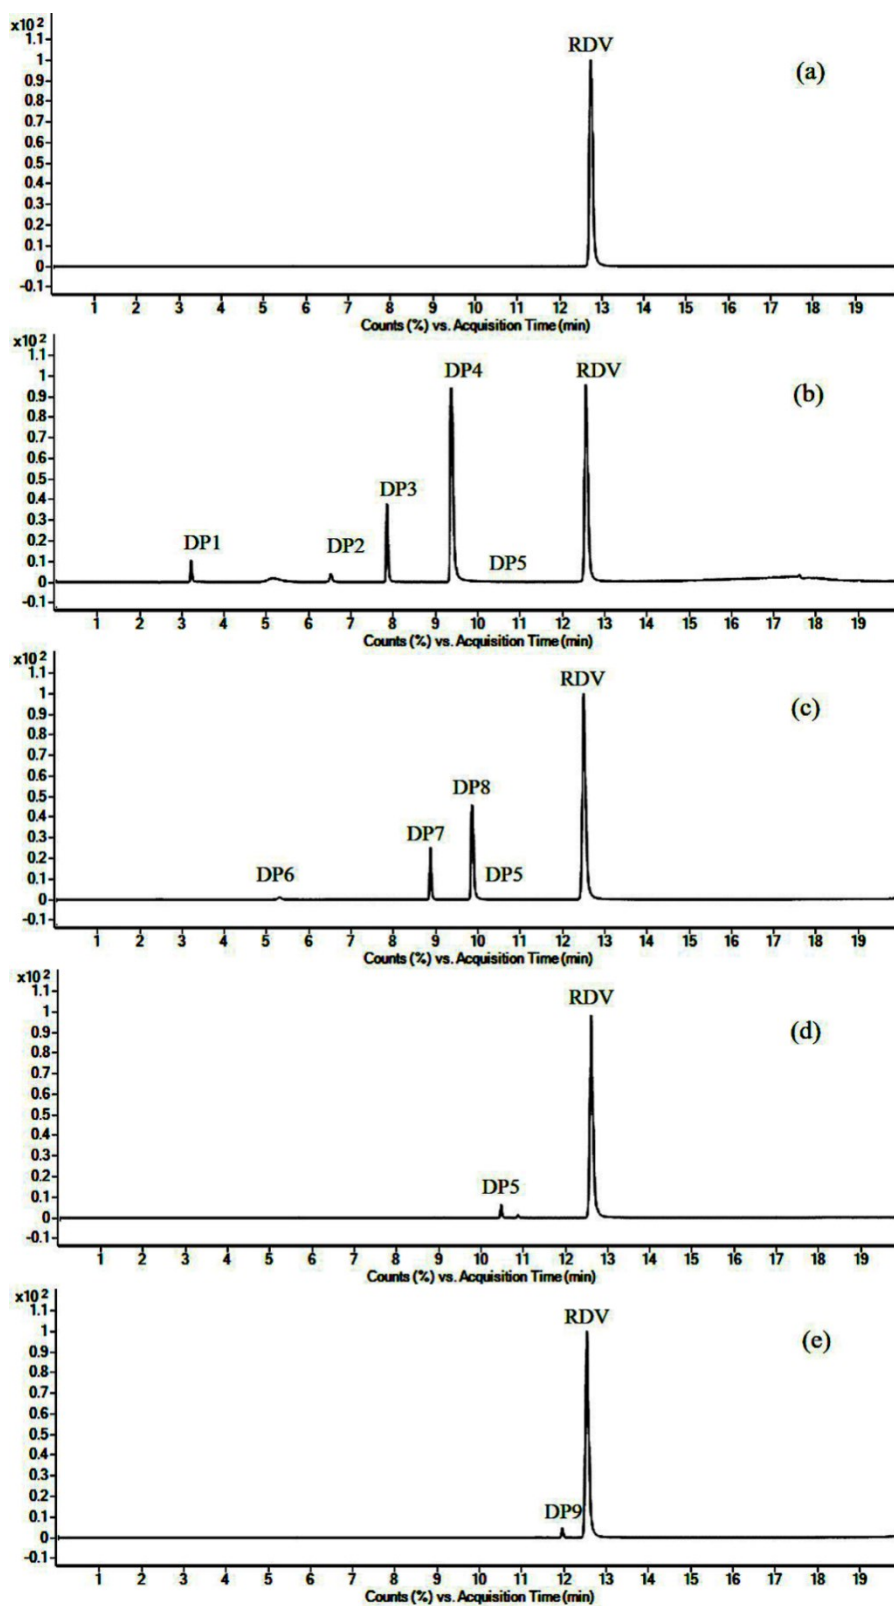

**Figure S3.** Extracted ion chromatograms (EICs) of (a) RDV(603.2333), (b) RDV (603.2333), DP1 (372.0720), DP2(292.1048), DP3(448.1030), DP4(174.1495), and DP5(621.2439), (c) RDV(603.2333), DP5(621.2439), DP6(443.1084), DP7(519.1381), and DP8 (527.2000), (d) RDV (603.2333), and DP5 (621.2439), (e) RDV (603.2333), and DP9 (619.2293).

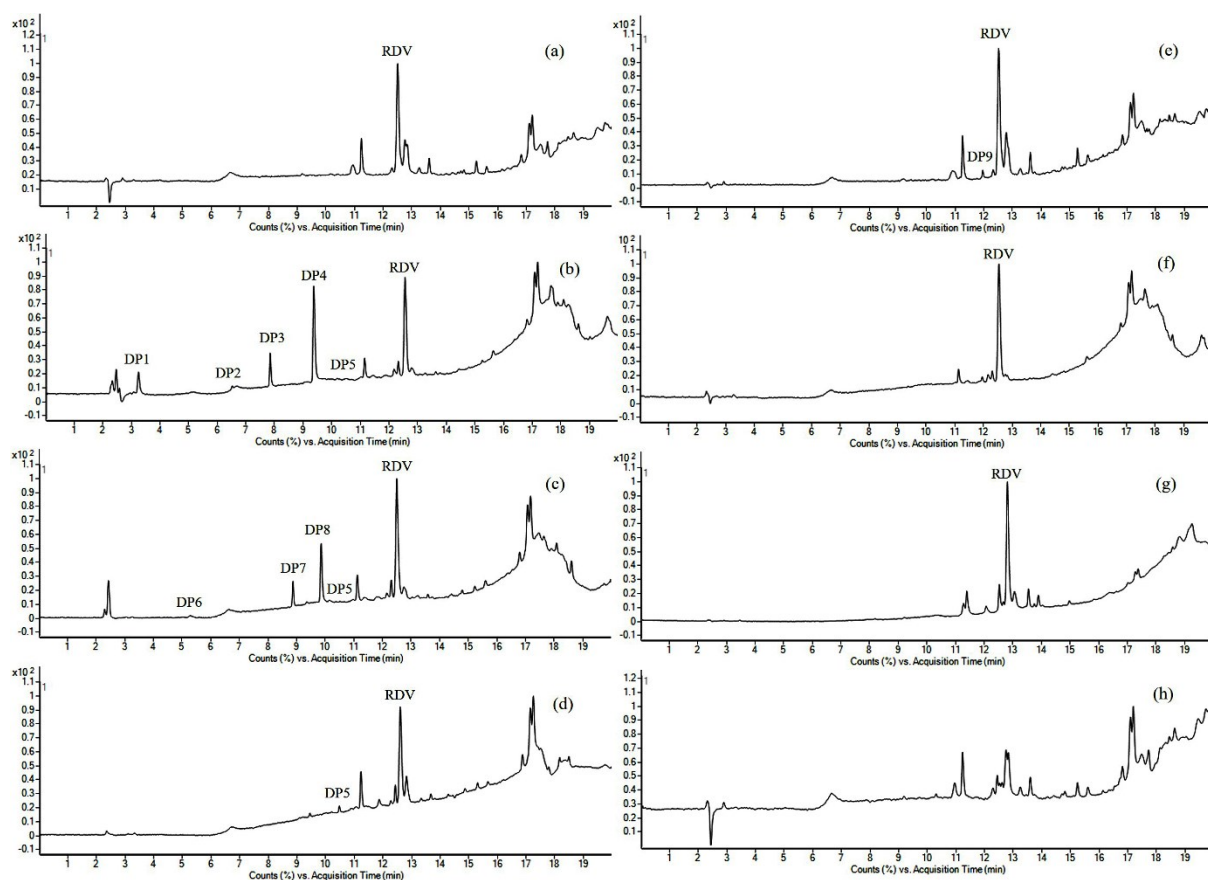

**Figure S4.** Total ion chromatograms (TICs) of (a) RDV, (b) acid degradation, (c) base degradation, (d) neutral degradation, (e) oxidative degradation, (f) thermal degradation, (g) photo degradation, and (h) blank

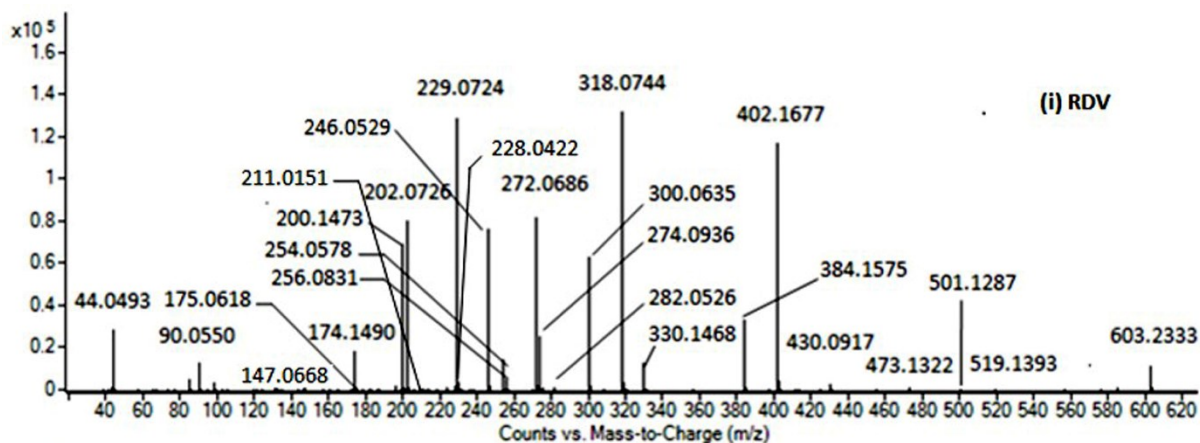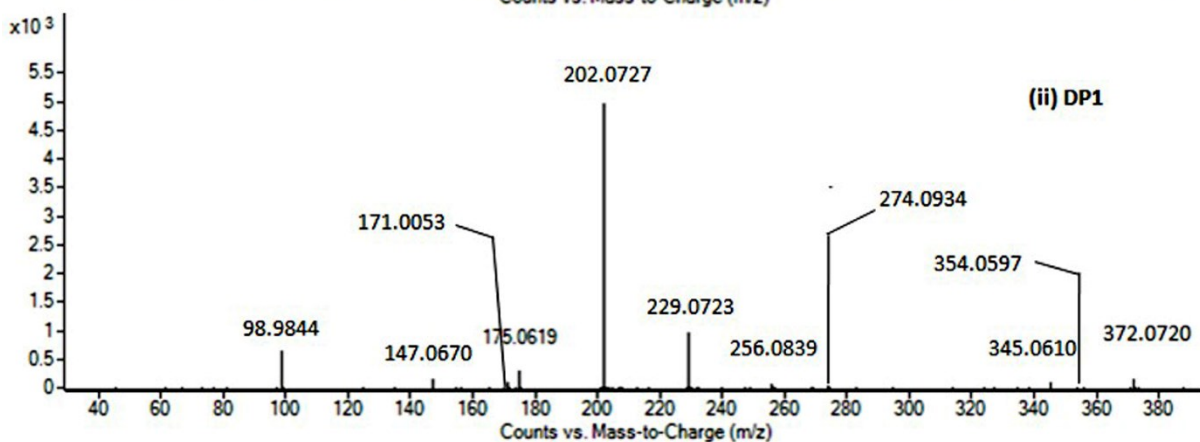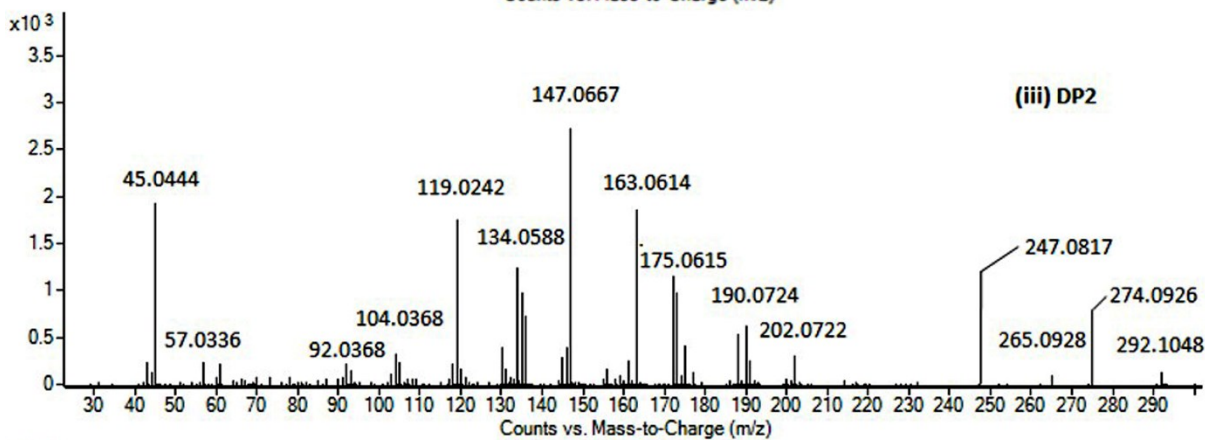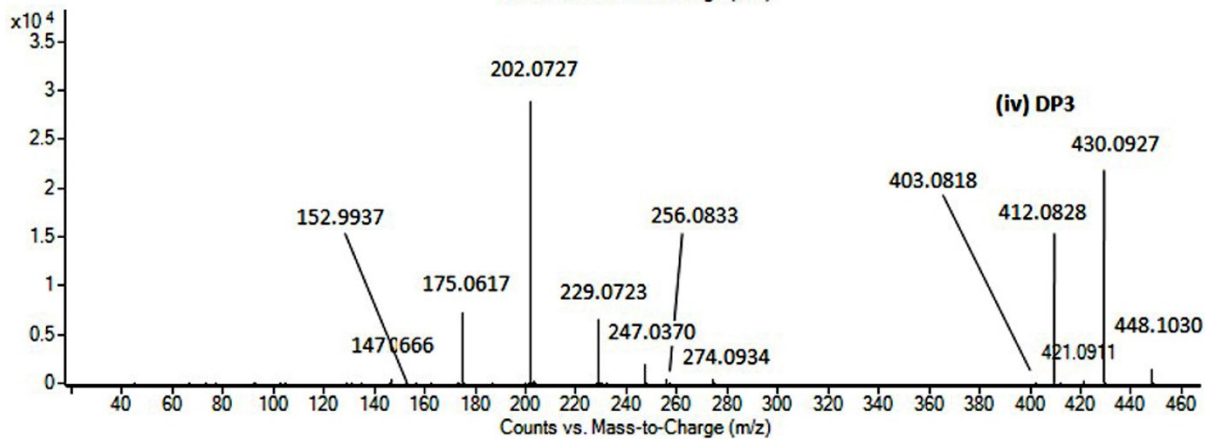

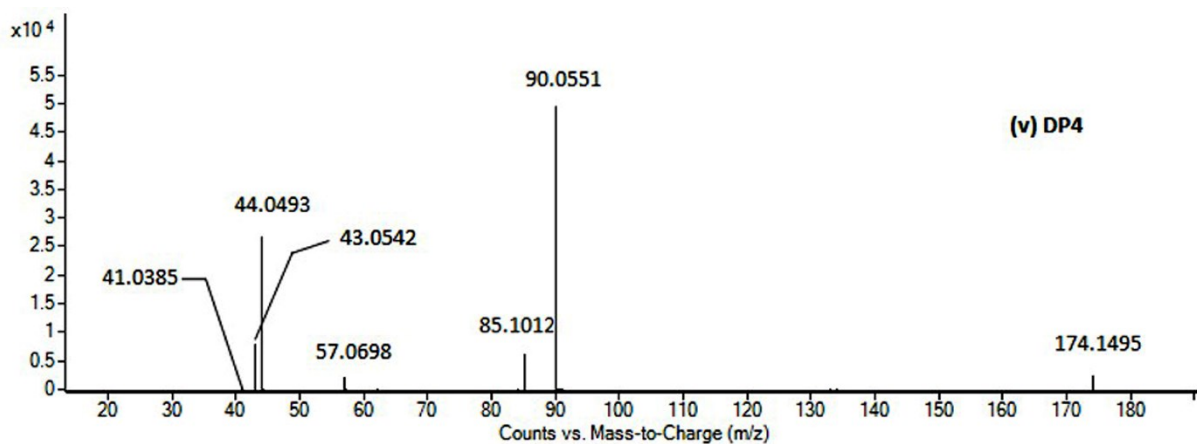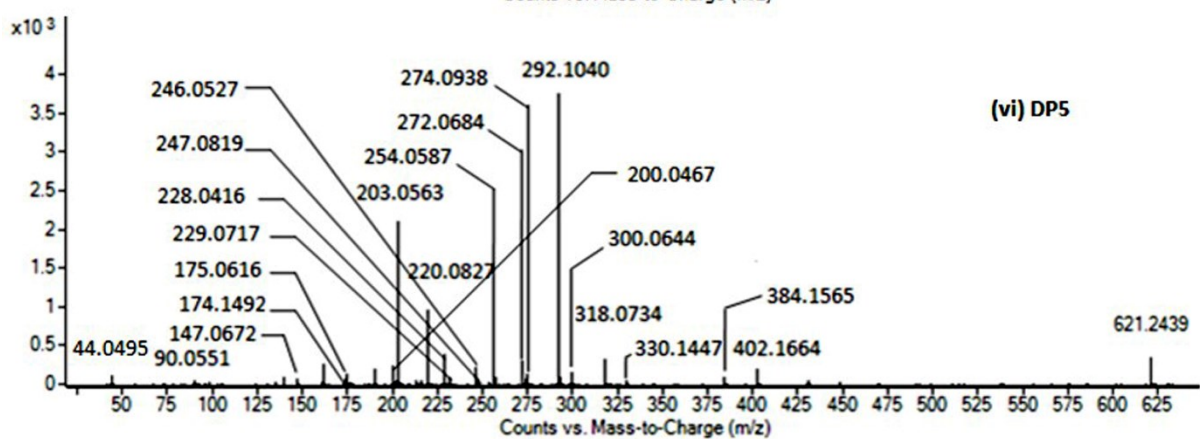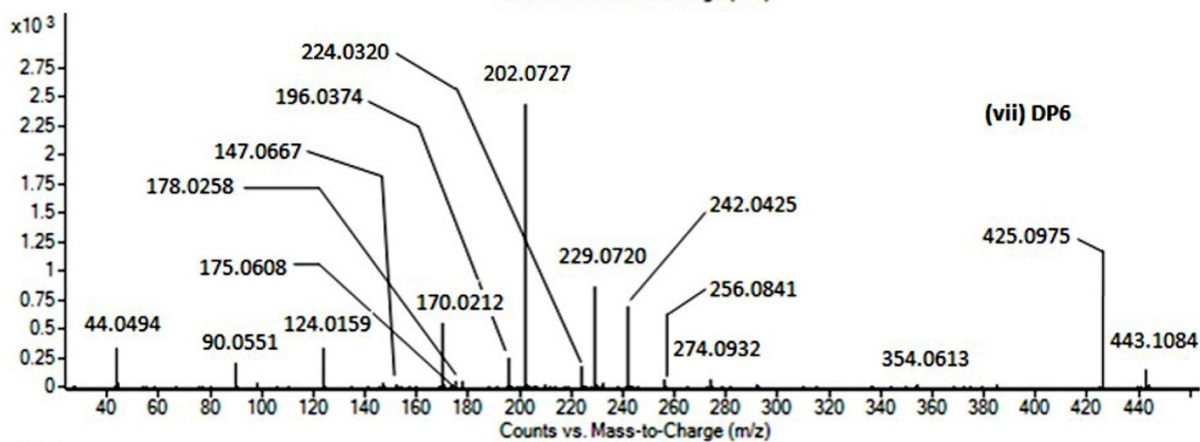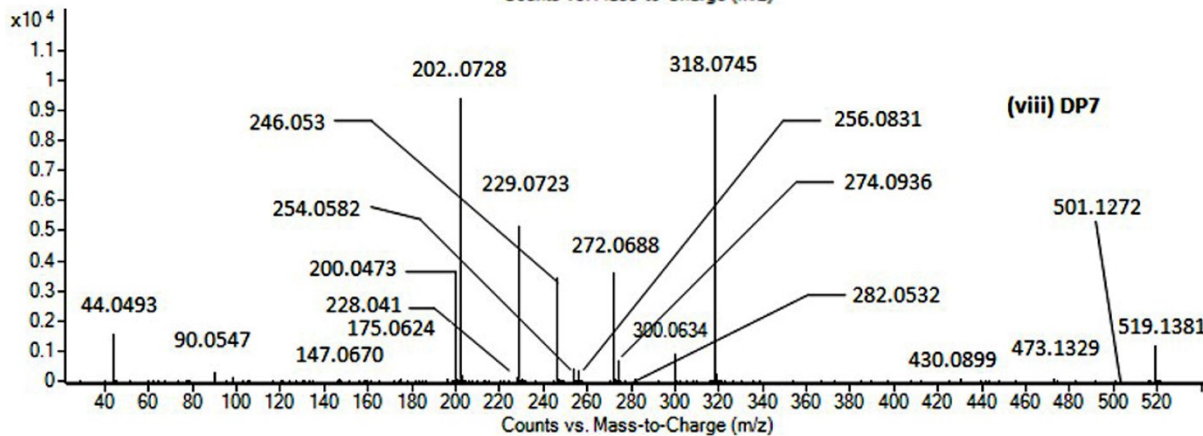

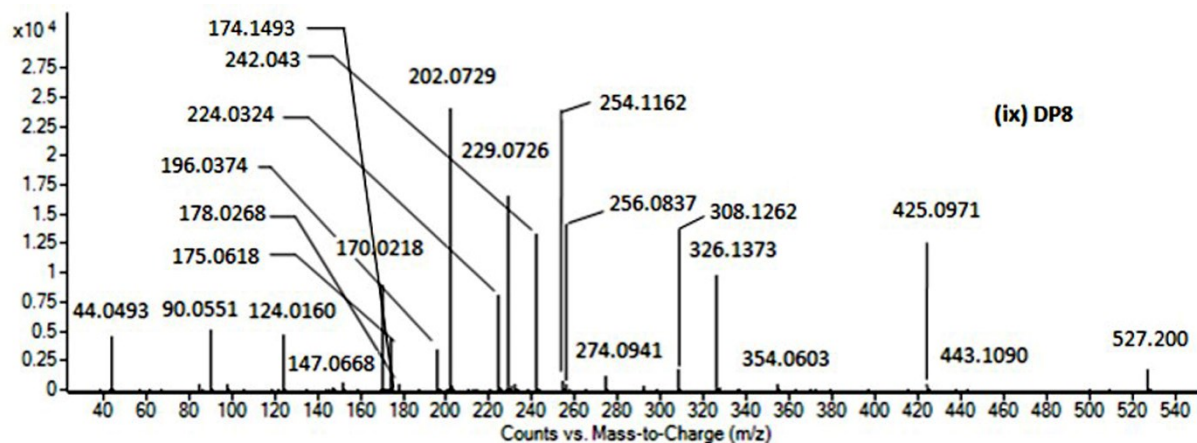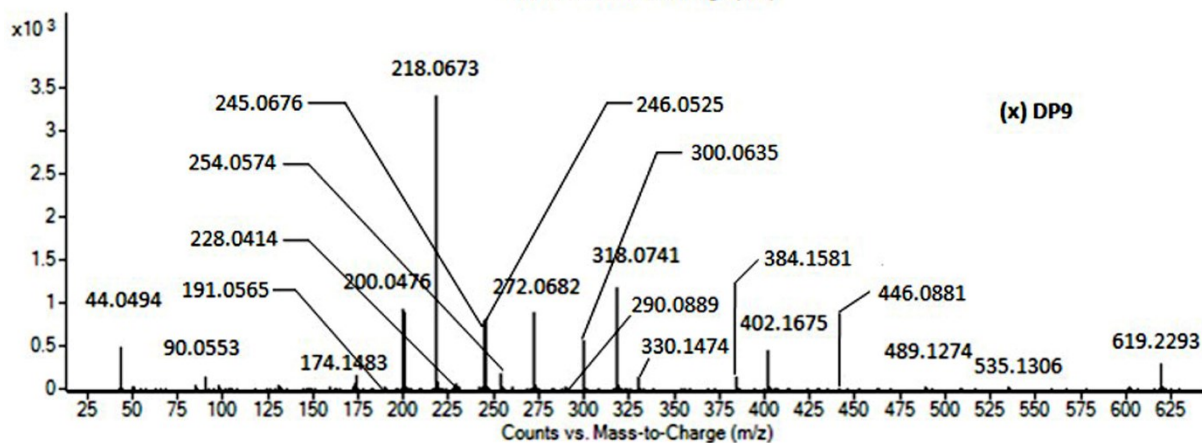

**Figure S5.** UHPLC-ESI-MS/MS spectra of  $[M+H]^+$  of (i) RDV ( $m/z$  603), (ii) DP1 ( $m/z$  372), (iii) DP2 ( $m/z$  292), (iv) DP3 ( $m/z$  448), (v) DP4 ( $m/z$  174), (vi) DP5 ( $m/z$  621), (vii) DP6 ( $m/z$  443), (viii) DP7 ( $m/z$  519), (ix) DP8 ( $m/z$  527), and (x) DP9 ( $m/z$  619)

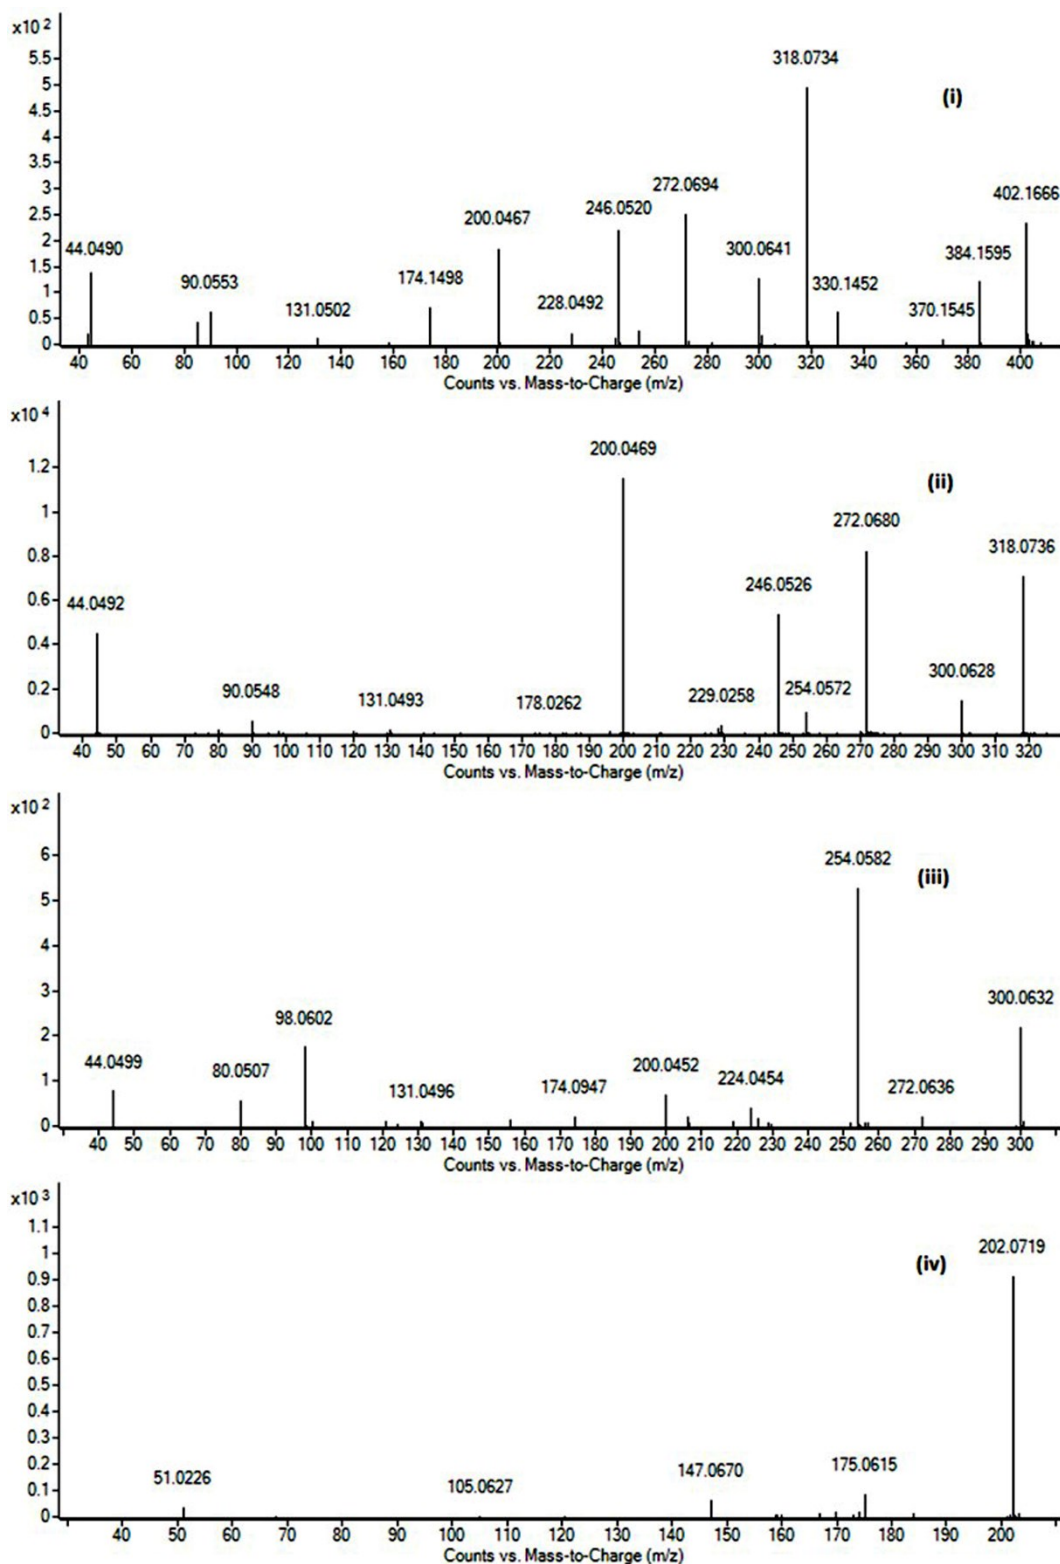

**Figure S6.** ESI-Pseudo- MS<sup>3</sup>spectra of ions at i)  $m/z$ 402, ii)  $m/z$  318, iii)  $m/z$  300, and iv)  $m/z$ 202.



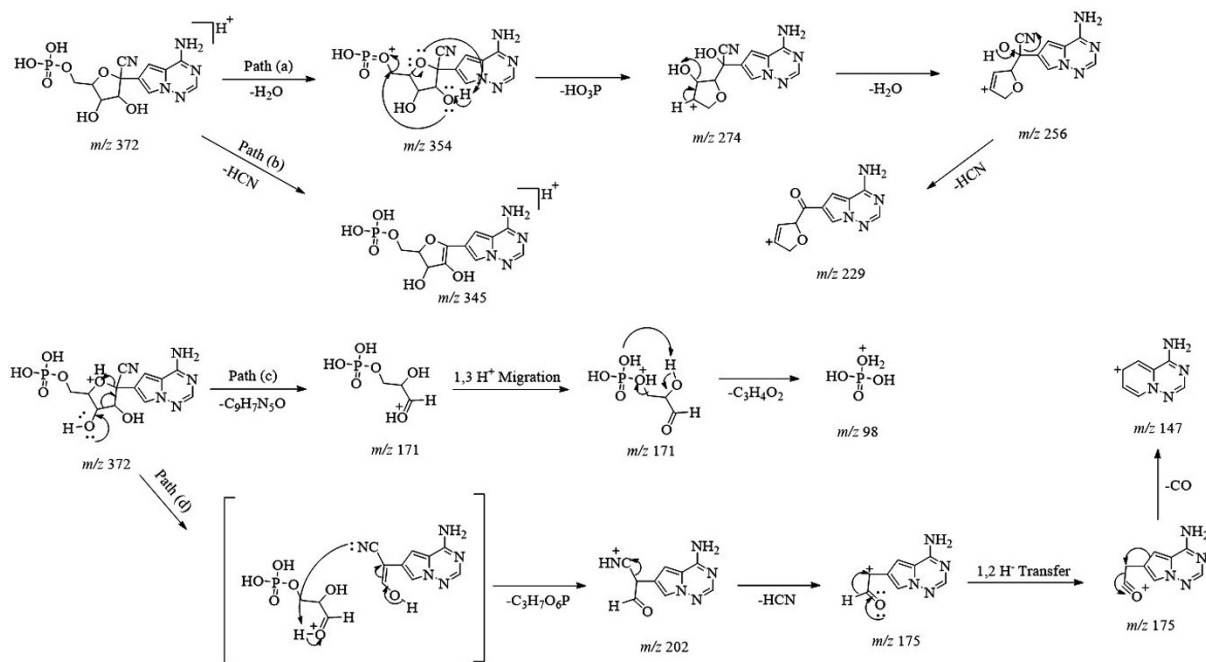

**Scheme S1.** Proposed fragmentation pathway for  $[M+H]^+$  of DP1.

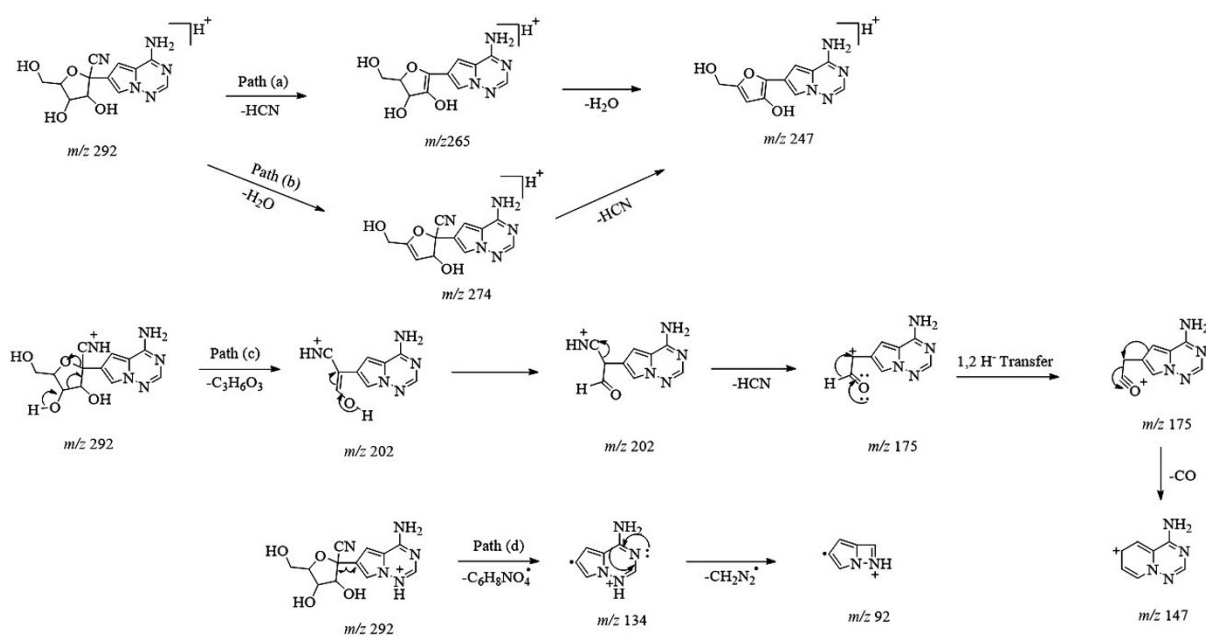

**Scheme S2.** Proposed fragmentation pathway for  $[M+H]^+$  of DP2.

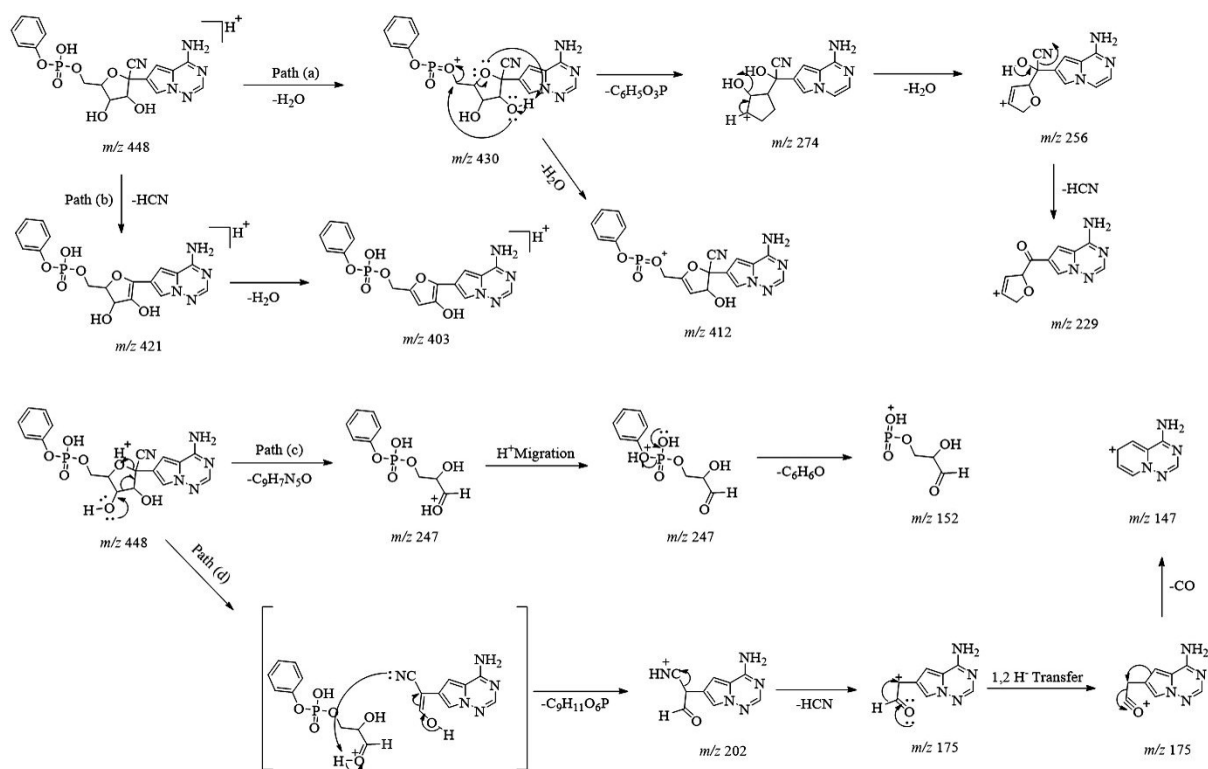

**Scheme S3.** Proposed fragmentation pathway for  $[M+H]^+$  of DP3.

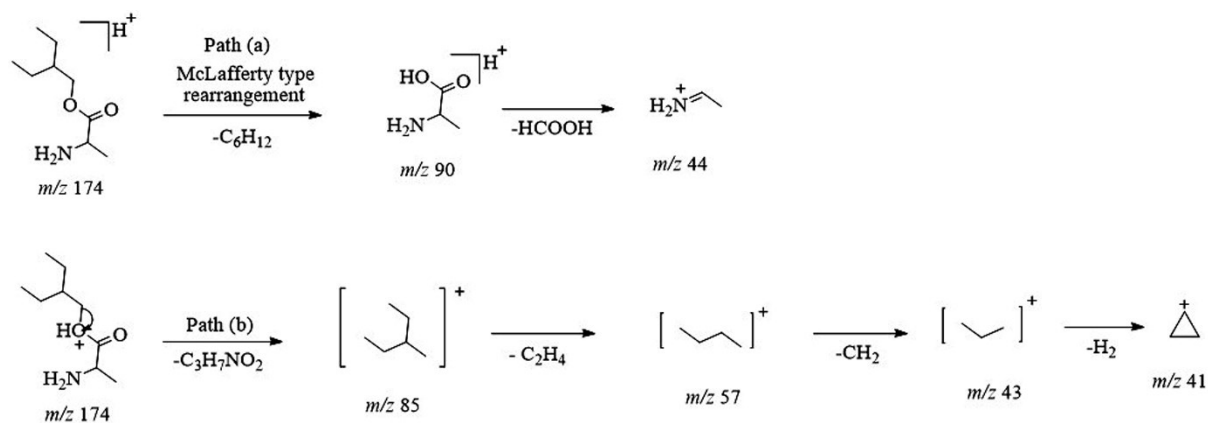

**Scheme S4.** Proposed fragmentation pathway for  $[M+H]^+$  of DP4.

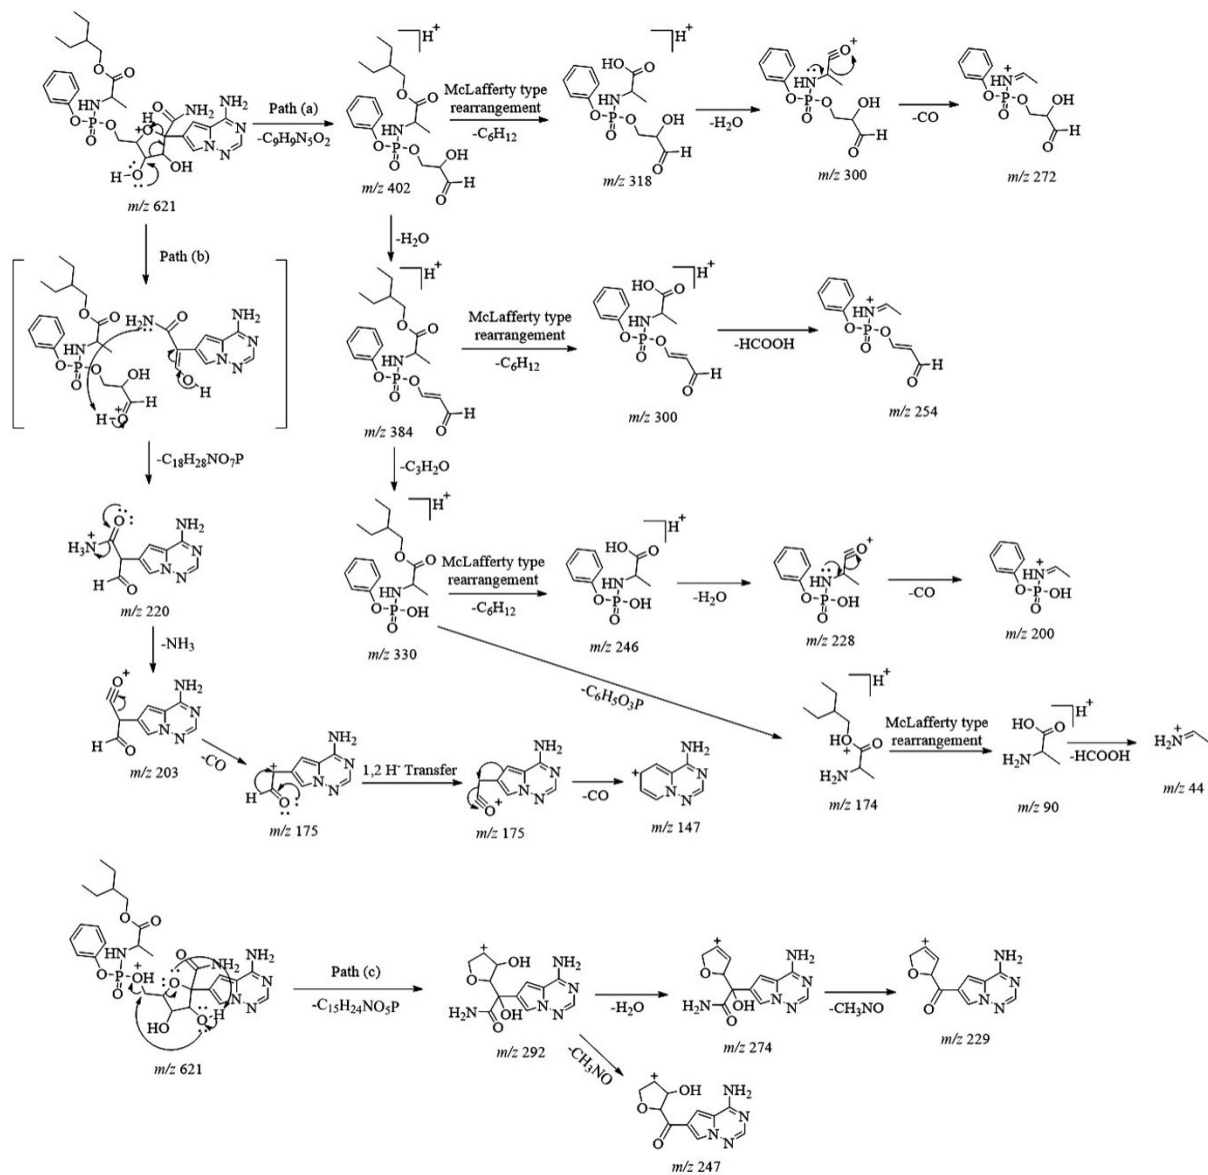

**Scheme S5.** Proposed fragmentation pathway for  $[\text{M}+\text{H}]^+$  of DP5.

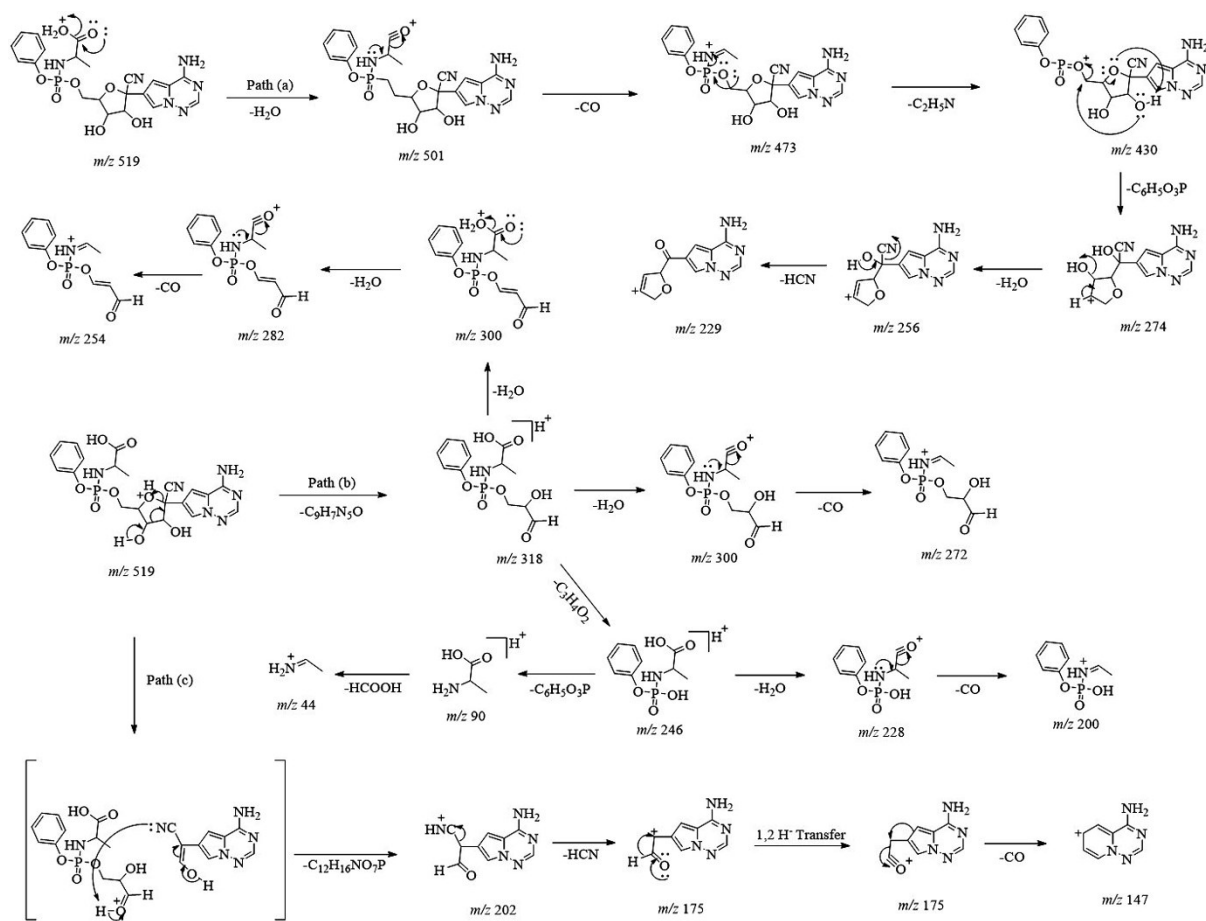

**Scheme S6.** Proposed fragmentation pathway for  $[M+H]^+$  of DP7.

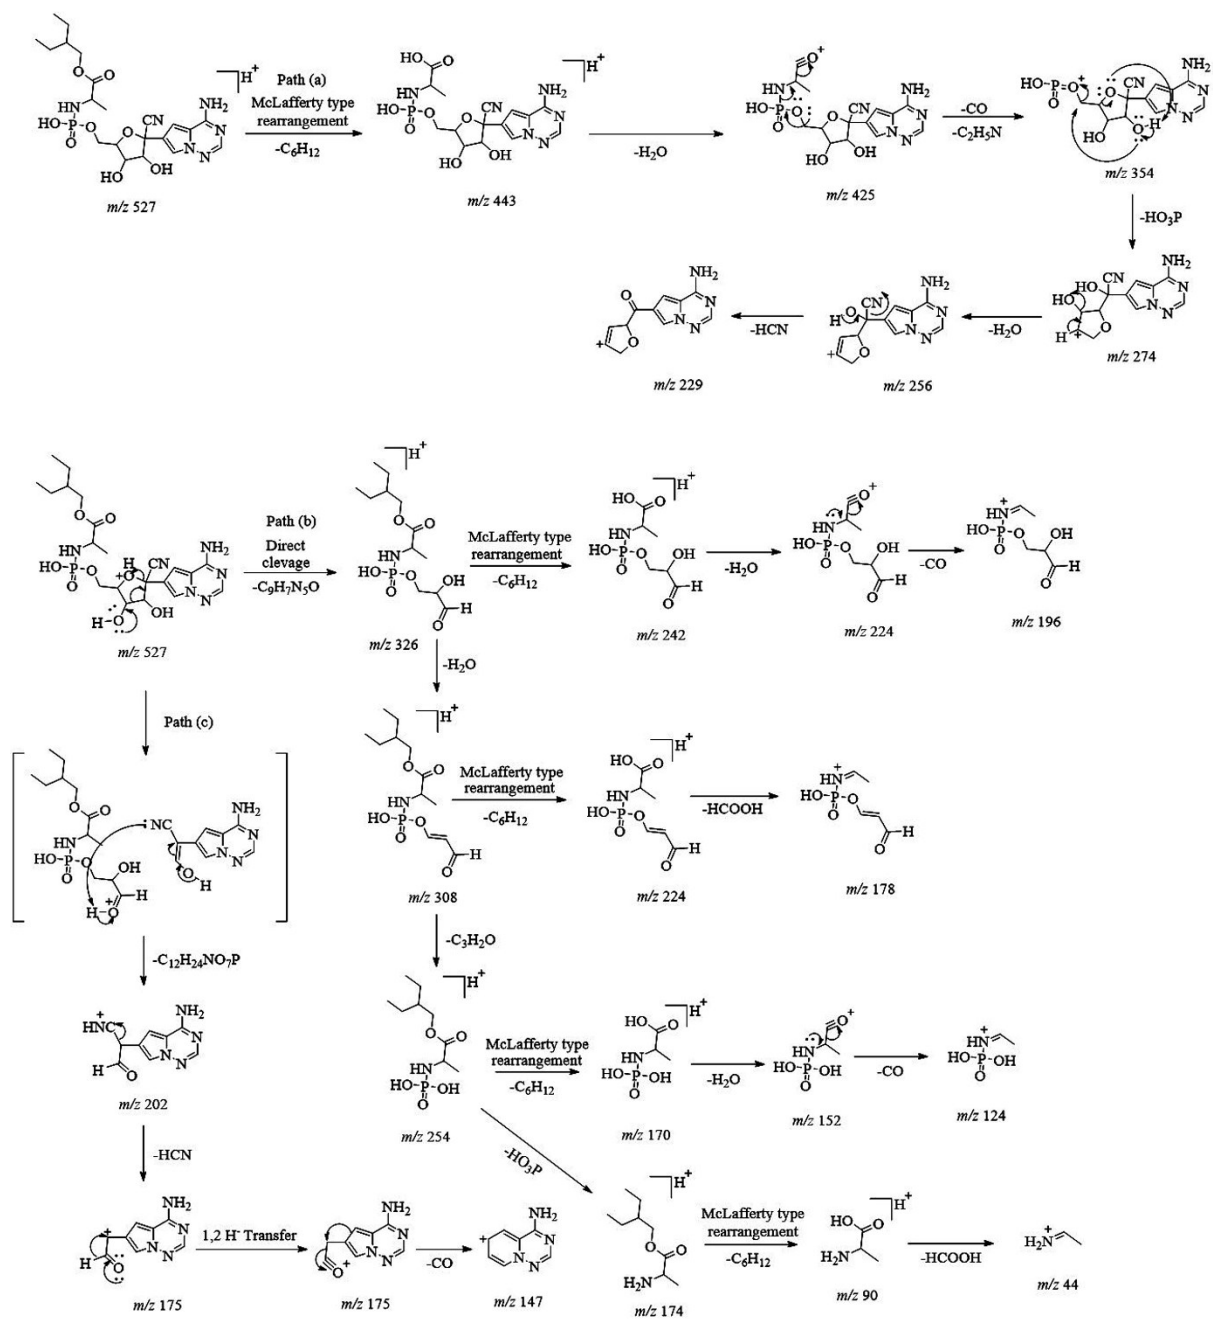

Scheme S7. Proposed fragmentation pathway for  $[M+H]^+$  of DP8.

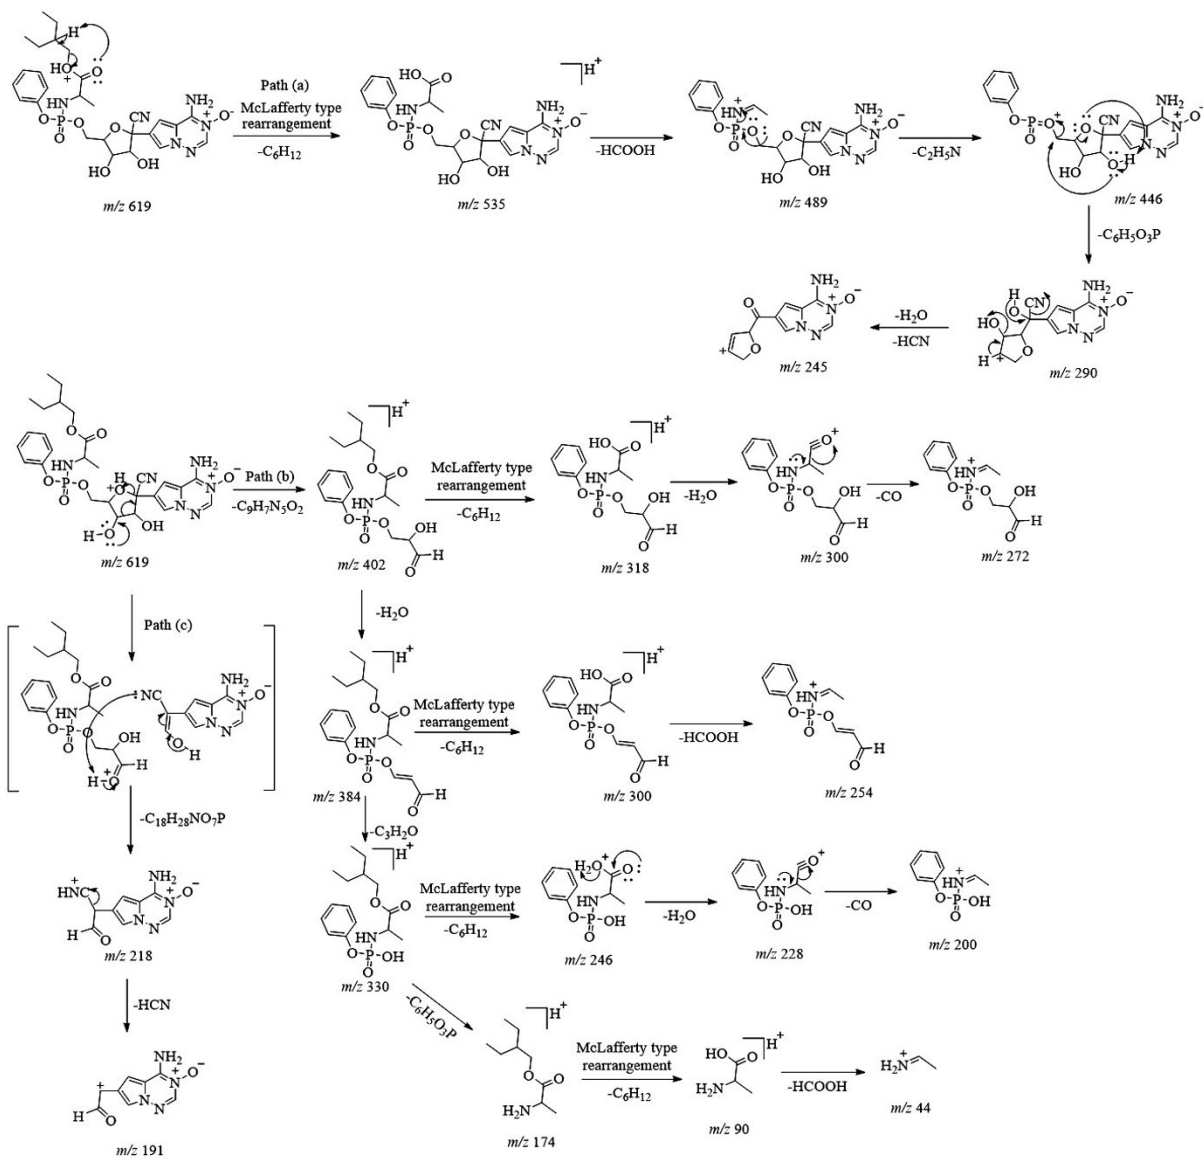

Scheme S8. Proposed fragmentation pathway for  $[M+H]^+$  of DP9.
